# Supplementary material for: The influence of iodine on the Antarctic stratospheric ozone hole
Source: PubMed Central journal article supplement — Proc Natl Acad Sci U S A. 2022 Feb 7;119(7):e2110864119. doi: 10.1073/pnas.2110864119 (PMC8851550; doi:10.1073/pnas.2110864119), 2022-02-07
Supplement: pnas.2110864119.sapp.pdf [file pnas.2110864119.sapp.pdf]

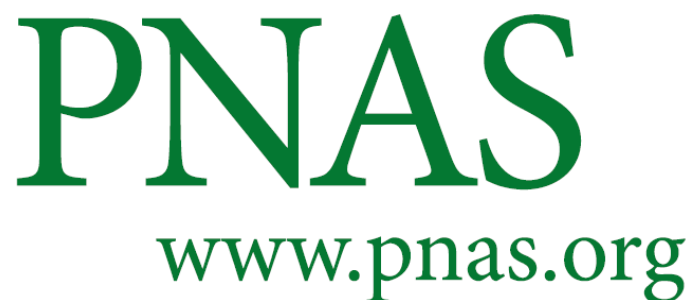

## Supplementary Information for

### The influence of iodine on the Antarctic stratospheric ozone hole

Carlos A. Cuevas<sup>1,\*</sup>, Rafael P. Fernandez<sup>2-3</sup>, Douglas E. Kinnison<sup>4</sup>, Qinyi Li<sup>1</sup>, Jean-François Lamarque<sup>5</sup>, Tarek Trabelsi<sup>6</sup>, Joseph S. Francisco<sup>6</sup>, Susan Solomon<sup>7</sup>, and Alfonso Saiz-Lopez<sup>1,\*</sup>

<sup>1</sup>Department of Atmospheric Chemistry and Climate, Institute of Physical Chemistry Rocasolano, CSIC, Madrid, 28006, Spain

<sup>2</sup>Institute for Interdisciplinary Science, National Research Council (ICB-CONICET), Mendoza, 5501, Argentina

<sup>3</sup>School of Natural Sciences, National University of Cuyo (FCEN-UNCuyo), Mendoza, 5501, Argentina

<sup>4</sup>Atmospheric Chemistry Observation and Modeling, National Center for Atmospheric Research, Boulder, CO 80305, USA

<sup>5</sup>Climate and Global Dynamics Laboratory, National Center for Atmospheric Research, Boulder, CO 80305, USA

<sup>6</sup>Department of Chemistry, University of Pennsylvania, Philadelphia, PA 19104, USA

<sup>7</sup>Department of Earth, Atmospheric, and Planetary Sciences, Massachusetts Institute of Technology, Cambridge, MA, 02139, USA

\*Corresponding author: Alfonso Saiz-Lopez and Carlos A. Cuevas

Email: a.saiz@csic.es; ccuevas@iqfr.csic.es

#### This PDF file includes:

Supplementary text  
Figures S1 to S14  
Tables S1 to S4  
SI References

## Supplementary information test

### Theoretical calculations for the destruction of photo-dissociation of iodate

Two plausible mechanisms may lead to the photochemical destruction or the photodissociation of  $\text{IO}_3^-$ :

#### Mechanism 1

Table S1 predict the vertical excitation energies for the low-lying electronic states of  $\text{IO}_3^-$ . Absorption of a photon to these states or to the detachment continuum ( $h\nu < 263 \text{ nm ADE (1)}$ ) lead to the photodetachment. In this case, many products may be produced such as:

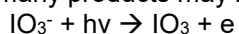

$\text{IO}_3^-$  photodetaches an electron to produce neutral  $\text{IO}_3$ .

Other possible products are

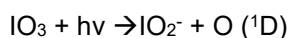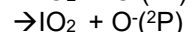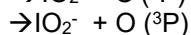

Depending on the absorption energy, the above channels are plausible, since, there is high density of electronic states of the  $\text{IO}_3^-$  (for  $h\nu < 263 \text{ nm}$ ) and these states cross the ground state of the neutral which easily lead to photodetachment.

#### Mechanism 2

$\text{IO}_3^-$  is characterized by many excited stable states and present real minimum in their PES (their minimum located below the ground state of the neutral and correlate to dissociation limits located below the first dissociation limit of the neutral, Fig S1). Absorption of a photon in visible or near UV region i.e. ( $263 < h\nu < 442 \text{ nm}$ ) to these states may lead to the production of  $\text{IO}_2^- + \text{O}$ . Indeed, three triplet states correlate to the first dissociation limit, and these states are crossed by singlet states that correlates to  $\text{IO}_2 + \text{O}^-$  dissociation limit. In this case, the photodissociation process may occur through the spin-orbit coupling at the crossing point between singlet-triplet to produce  $\text{IO}_2^-$  and  $\text{O}$  in their ground electronic states.

Moreover, the first excited singlet state of  $\text{IO}_3^-$  is unstable relative to  $\text{IO}^- + \text{O}_2$  dissociation limit. Since the minimum of  $S_1$  located above the  $\text{IO}^- + \text{O}_2$  dissociation limit and absorption to  $S_1$  state may lead to  $\text{IO}^- + \text{O}_2$  product and this competes with the production of  $\text{IO}_2^- + \text{O}$  and  $\text{IO}_3 + e$ .

The destruction of  $\text{IO}_3^-$  easily occurs for shorter wavelength whereas its photodissociation for longer wavelength is less plausible since the lowest singlet and triplet state are weakly bounded and their minimum located below the first dissociation limits.

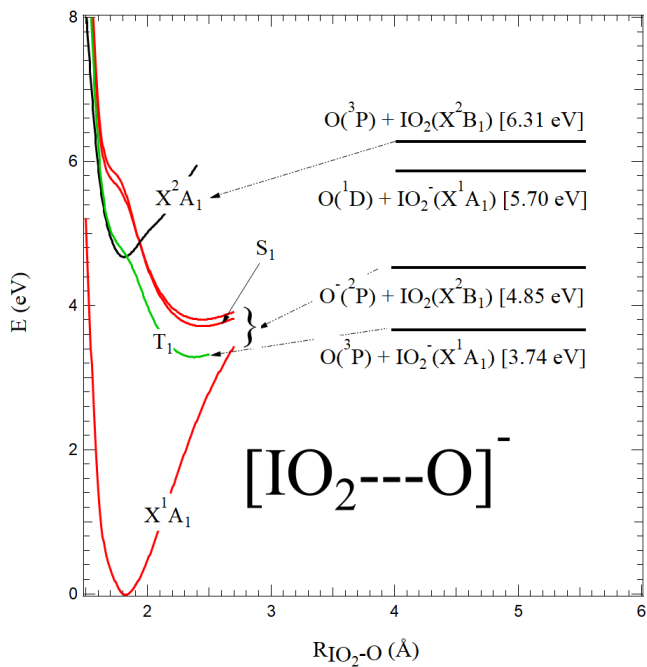

**Fig S1.** MRCI+Q/aug-cc-pVTZ-PP PES of the low-lying excited state of  $\text{IO}_3^-$  along the IO bond length. The electronic ground state of the neutral  $\text{IO}_3$  is shown in black. Default active space selected for all calculations at MRCI+Q level.

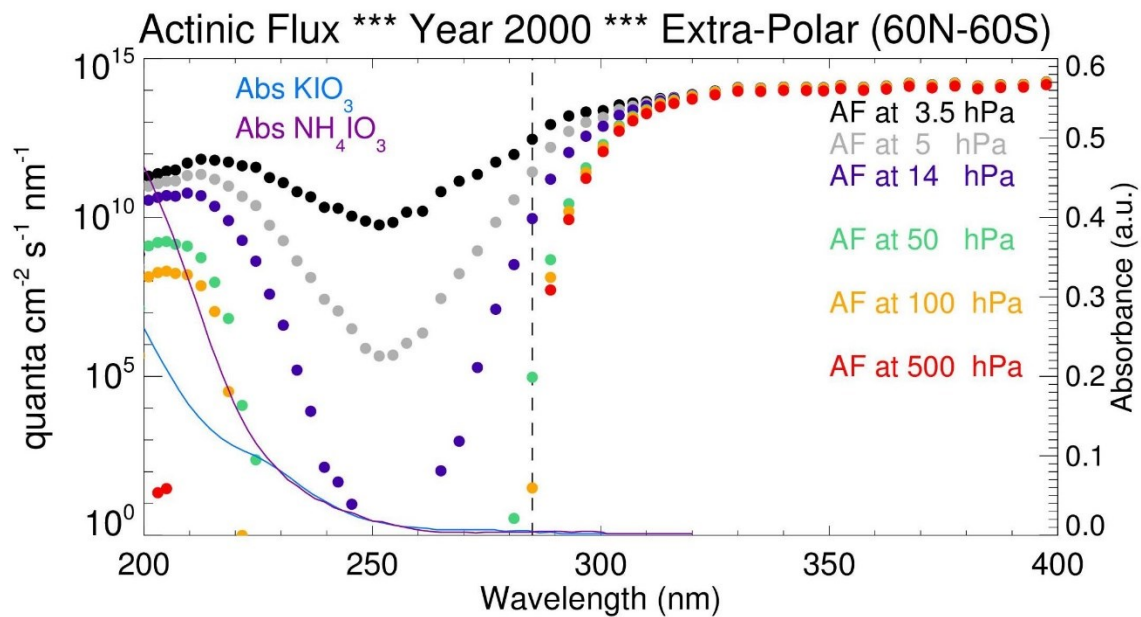

**Figure S2.** Modeled 2000 annual averaged wavelength dependent Actinic flux (AF) at different altitudes (colored dots, left axis), together with the absorbance of iodate ( $\text{KIO}_3$  and  $\text{NH}_4\text{IO}_3$ ) species (blue and purple lines, right axis) from Galvez et al., 2016(2).

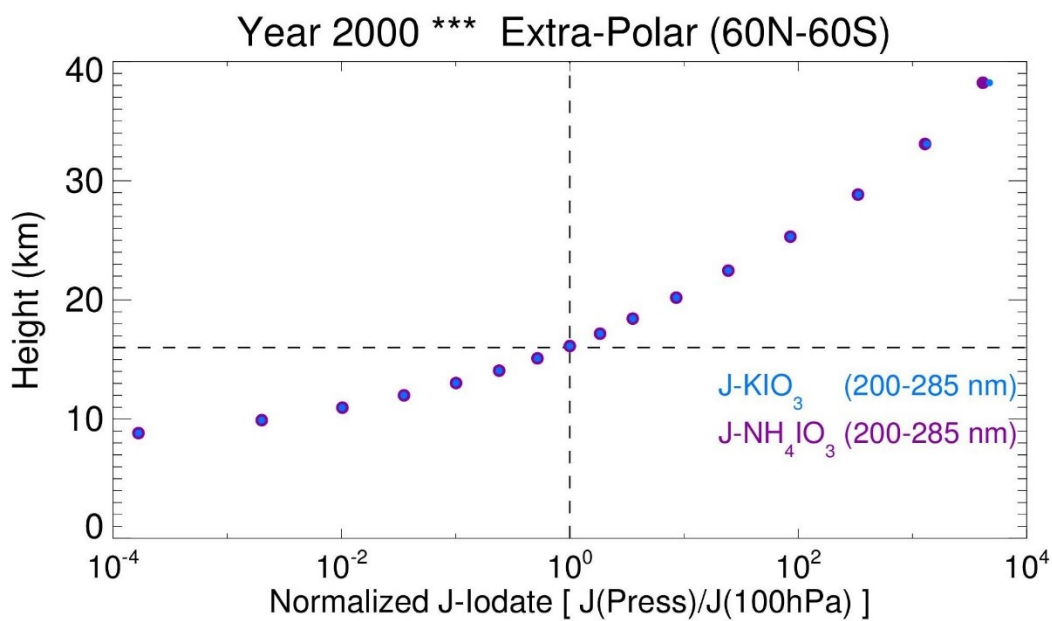

**Figure S3.** Vertical profile of normalized iodate ( $\text{KIO}_3$  and  $\text{NH}_4\text{IO}_3$ ) photolysis rates averaged during year 2000 within the extra-polar ( $60^\circ\text{S}$ - $60^\circ\text{N}$ ) region. J-iodate normalization has been performed with respect to the J-value obtained at approx. 100 hPa (~16-17 km). The wavelength range used for the photolysis rate computation is 200-285 nm (Fig. S2).

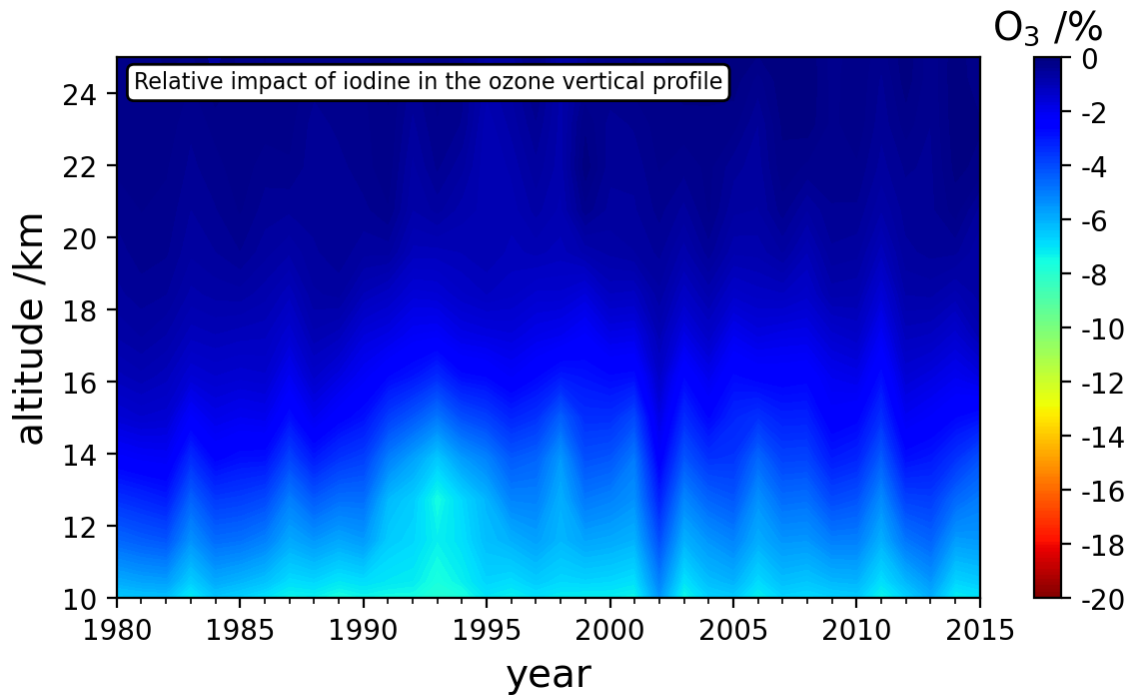

**Figure S4.** Impact of iodine in the ozone vertical profile, averaged in September and October in the 90°S-70°S region during the 1980-2015 period. Equivalent to Fig. 2a for the “I<sub>part</sub>” simulation. Color scale is the same as Fig. 2a for better comparison.

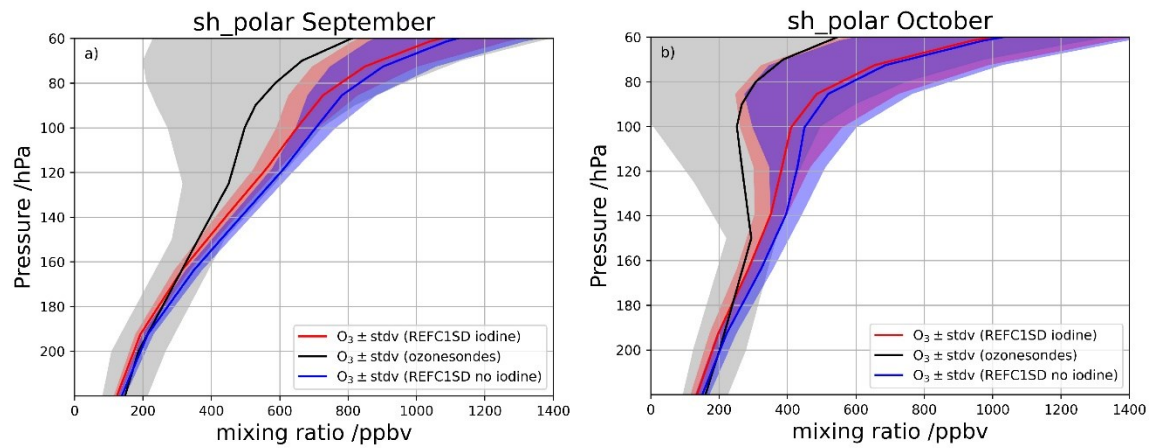

**Figure S5.** Comparison of model output (from base iodine and without iodine simulations) to ozonesonde climatology between 1995 and 2011 for the months of September and October. Observations from (3). Ozonesonde climatology include observation from the Marambio, Neumayer and Syowa stations. Model output is the monthly average over the three stations (Marambio: 66°-62°S and 58°-54°W; Neumayer: 72°-68°S and 10°-6°W; Syowa: 71°-67°S and 37-41°E)

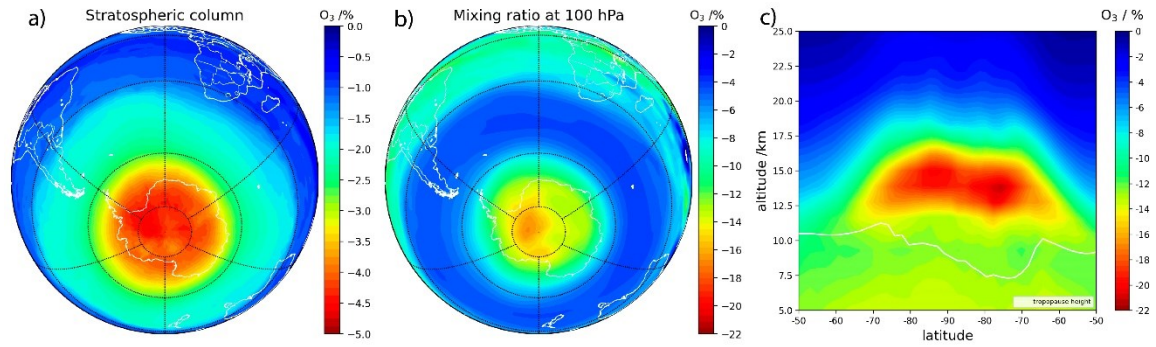

**Figure S6.** Effect of iodine chemistry in the Antarctic stratospheric ozone depletion in September 1993: a) effect on the stratospheric vertical column, b) effect at 16 km altitude (~100 hPa) and c) averaged meridional slice at 0° longitude, in which the effect of iodine chemistry can be seen spatially as a function of latitude and altitude. The relative percentage difference has been computed as  $((\text{iodine run} - \text{no iodine run}) / \text{no iodine run}) \times 100$ .



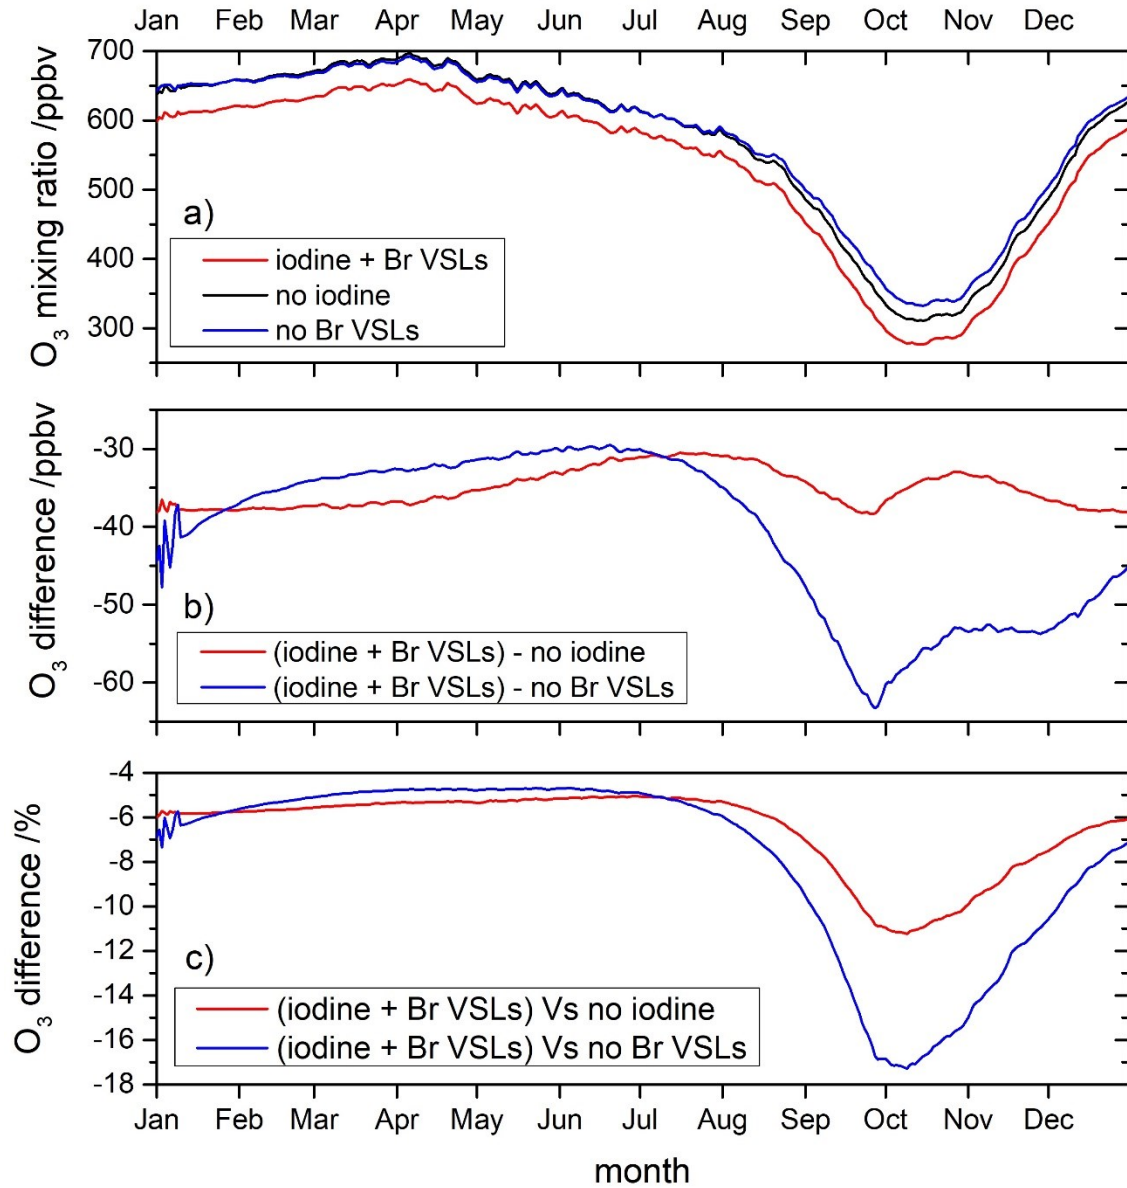

**Figure S7.** Daily evolution of the ozone hole during the 1980-2015 period in the region 90°S-70°S at 11-16 km altitude for the three simulations (a). The iodine run includes the three halogen chemical scheme (red line), the no iodine run includes only bromine and chlorine (black line), and the no Br VSLs run includes only iodine and chlorine VSLs (blue line). b) shows the ozone absolute difference in ppbv between the iodine and the no iodine runs and the difference between the iodine and no Br VSLs run. c) is the same as b) but displaying the ozone difference in percentage.

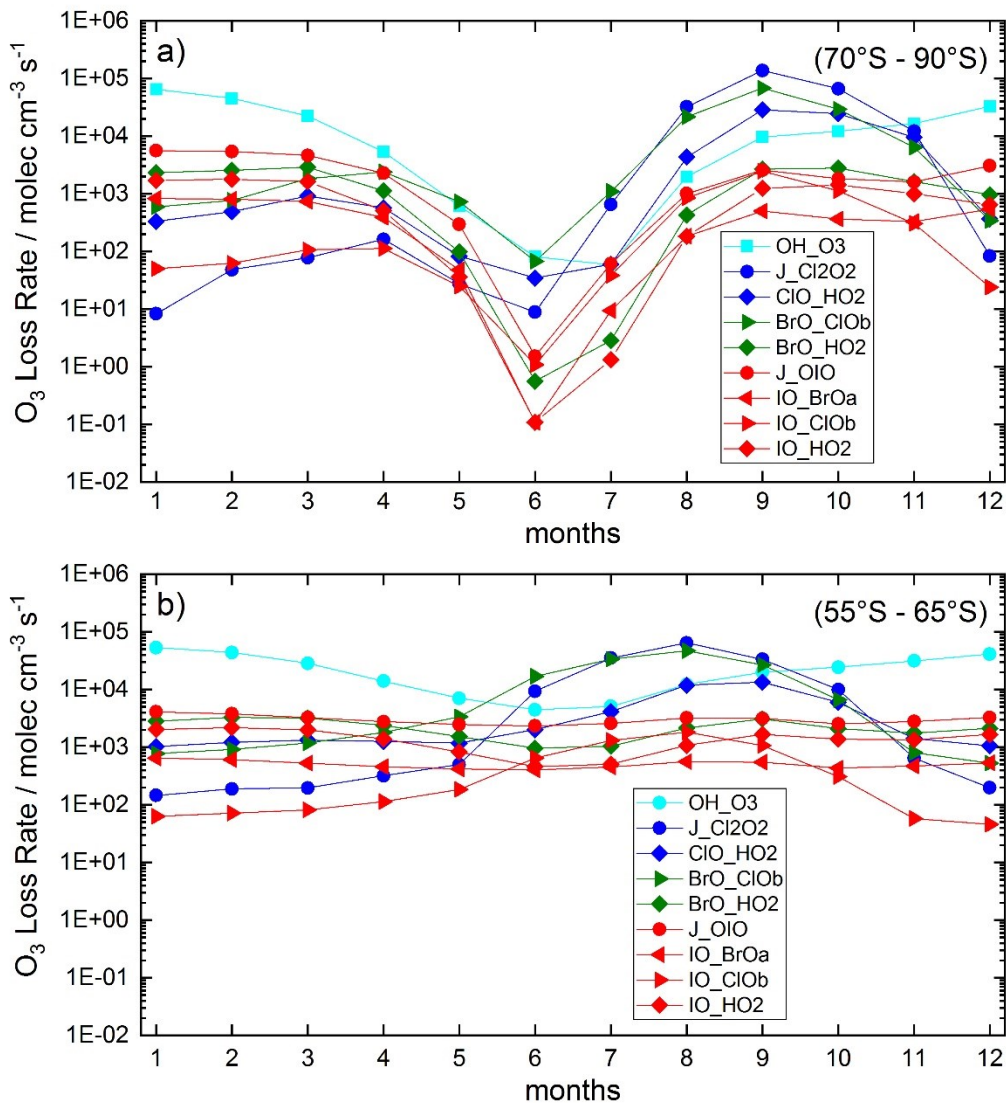

**Figure S8:** Absolute ozone loss rates averaged inside ( $90^{\circ}$ - $70^{\circ}$ S) and outside ( $55^{\circ}$ - $65^{\circ}$ S) the polar vortex at an altitude of 11-16 km (100 hPa). a) main loss rates for each family (grouped in colors) during spring for the simulation with iodine inside the polar vortex b) is the same as a) for mid-latitudes ( $65^{\circ}$ S- $55^{\circ}$ S). J(OIO) is the main channel in both regions, although inside the polar vortex this channel is matched by IO\_CIO during spring. Outside the polar vortex the second channel is IO\_HO<sub>2</sub>, followed by IO\_BrO. Only during wintertime, the IO\_CIO channels become more important but never exceed the J(OIO) channel.

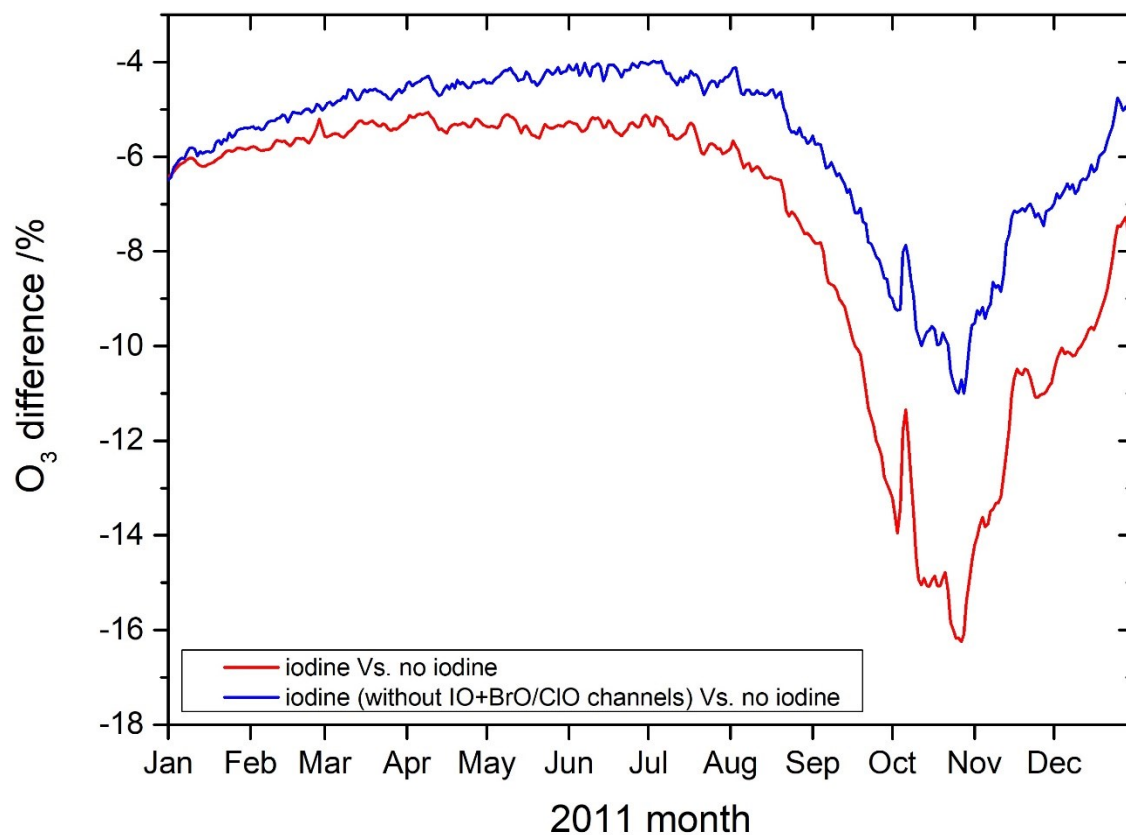

**Figure S9.** Relative daily evolution of ozone levels during 2011 in the region 90°S-70°S at 11-16 km altitude. The red line represents the ozone relative difference between the iodine run and the no iodine run, while the blue line is the ozone relative difference between the iodine run without the IO+BrO/ClO channels above the tropopause in the polar regions and the no iodine run. The standard iodine run destroys up to 16% at the end of October in 2011 compared to the no iodine run, while the iodine without the IO+BrO/ClO channels run destroys up to 11%. The 5 percentage points difference is the contribution from the IO+BrO/ClO channels in 2011 in the Antarctic spring.

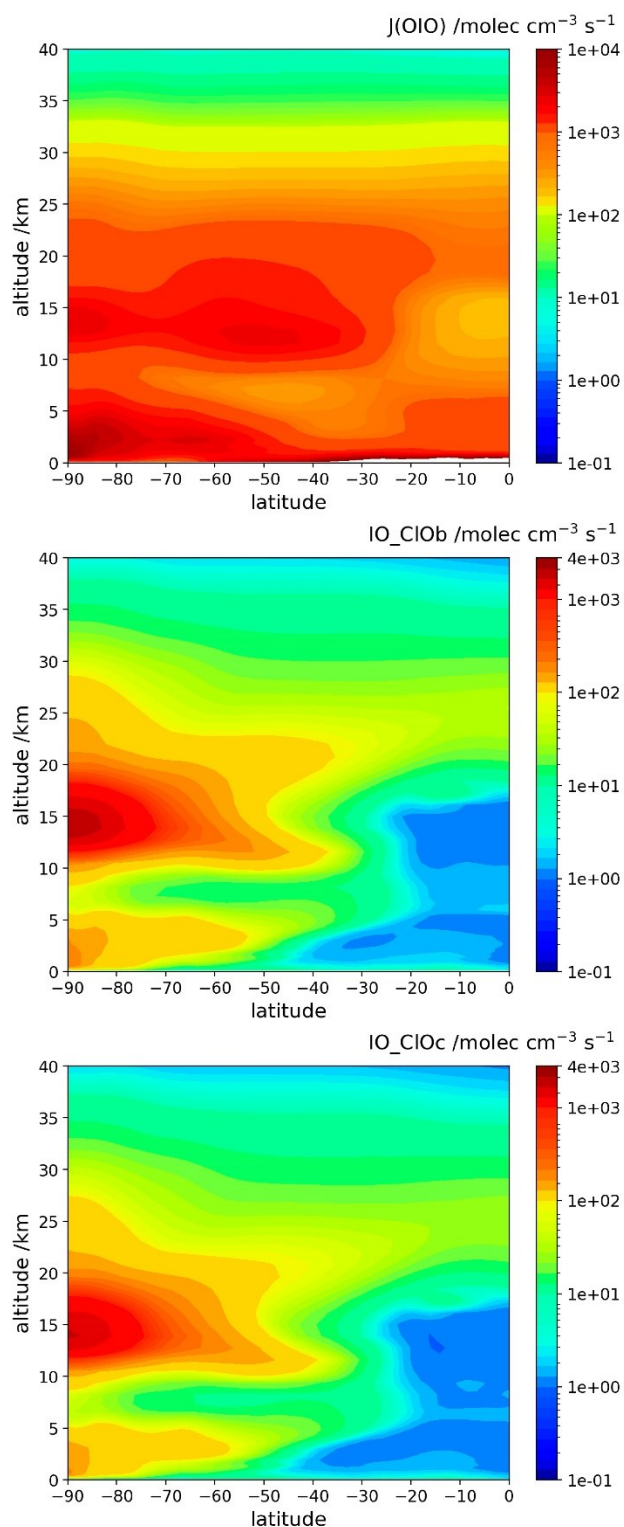

**Figure S10.** 1980-2015 October zonally averaged rates of the two main iodine channels [IO-CIO and J(OIO)] involved in ozone depletion in the Antarctic stratosphere. The highest rates are below 16 km altitude, where reactant concentrations and temperatures conditions enhance the reactions  $\text{OIO} + h\nu \rightarrow \text{I} + \text{O}_2$  [J(OIO)],  $\text{IO} + \text{ClO} \rightarrow \text{I} + \text{Cl} + \text{O}_2$  [IO\_CIOb] and  $\text{IO} + \text{ClO} \rightarrow \text{ICl} + \text{O}_2$  [IO\_CIOc]. OIO abundance in springtime is very small (Fig. S10a), given the very fast photo-dissociation, but

its distribution can be inferred from its main source species IO ( $\text{IO} + \text{IO} \rightarrow \text{OIO} + \text{I}$  and  $\text{IO} + \text{O}_3 \rightarrow \text{OIO} + \text{O}_2$ ). Similarly, for the reactions of  $\text{IO} + \text{ClO}$ , ClO can be considered as kinetically being in excess with respect to IO, and the temperature and ozone levels more favourable for the formation of IO occurs at the 13-16 km altitude.

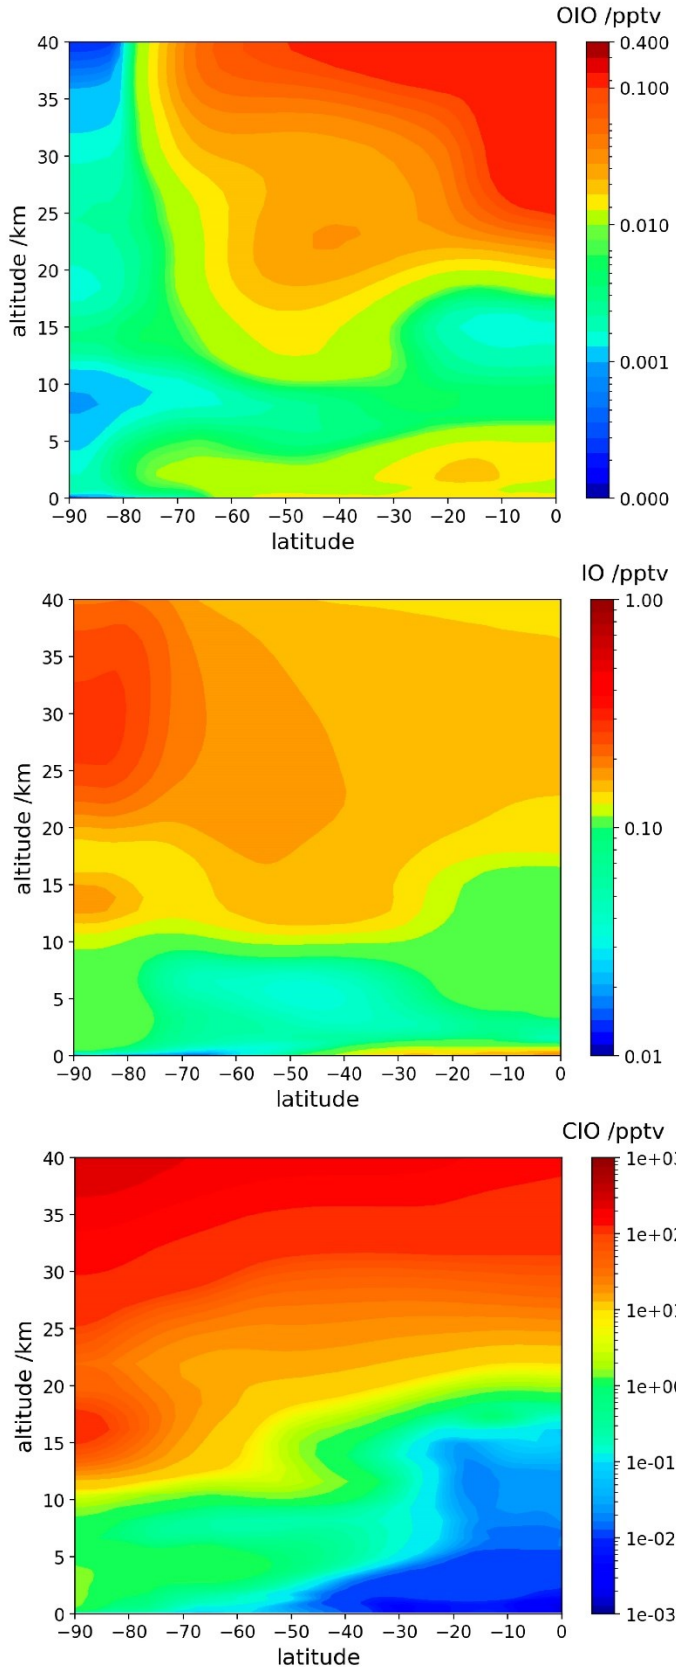

**Figure S11.** 1980-2015 October zonal averaged mixing ratios of OIO, IO and ClO.

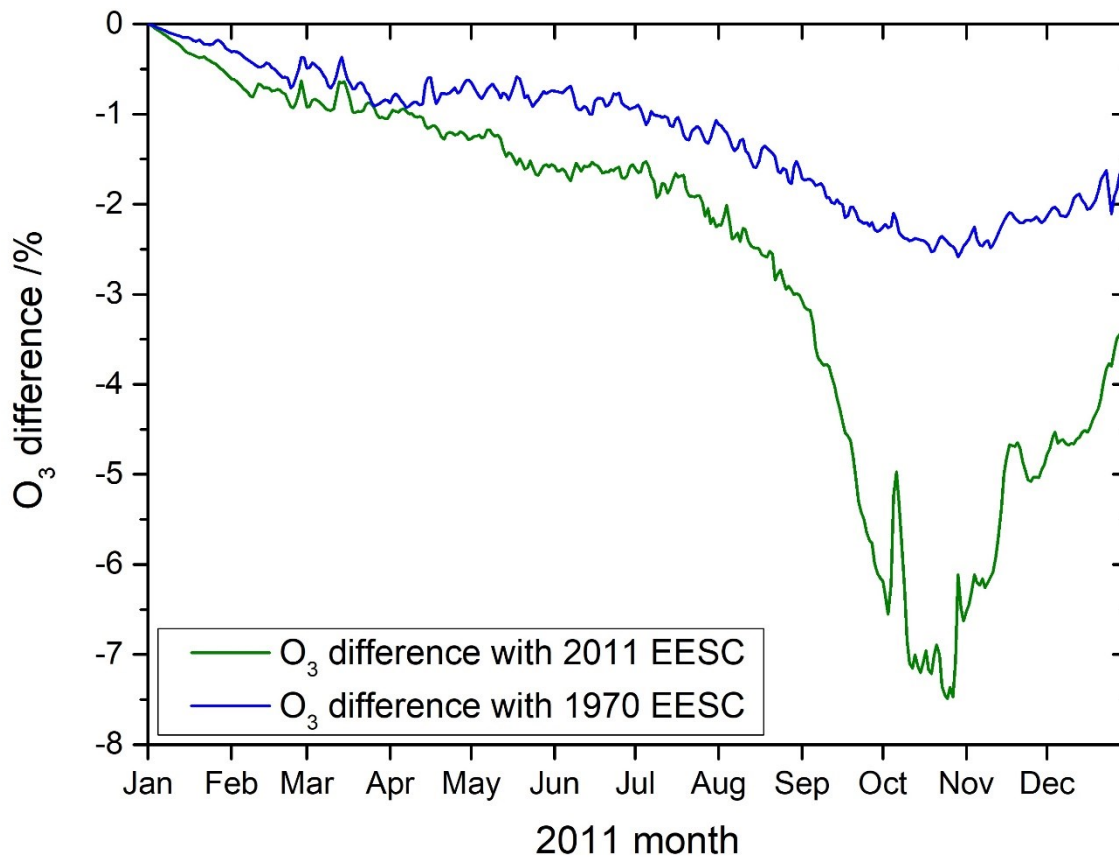

**Figure S12.** Daily evolution of the relative ozone difference in the region 90°S-70°S at 11-16 km altitude, for the different runs in the sensitivity performed making zero the values of the IO+ClO/BrO cross reaction channels above the tropopause during 2011, and also scaling chlorine and bromine levels to those in 1970. Both lines represent the ozone relative difference between the iodine run and the no iodine run with cross reaction rate constants zeroed (green line for 2011 EESC and blue line for 1970 EESC). In the September through October ozone hole period there is more depletion when cross reactions are included. E.g., October shows 8% and 2.5% more ozone when the cross reactions are zeroed for 2011 and 1970 EESC conditions (both EESC conditions use year 2011 met conditions). In October, there is three times more sensitivity of the cross reactions at higher (vs lower) EESC (i.e.,  $8/2.5 = 3.2$ ). This sensitivity results, during the ozone period, show the coupled reaction sensitivity is impacted by the ClO<sub>x</sub>/BrO<sub>x</sub> abundance. More ClO<sub>x</sub> and BrO<sub>x</sub> in 2011 produces more depletion compared to 1970. So the with and without IO+ClO/BrO reactions are showing a 2.5% increase with 1970 conditions and 8.0% increase with 2011 conditions. The ratio of 8.0/2.5 is an indication of the sensitivity to the EESC.

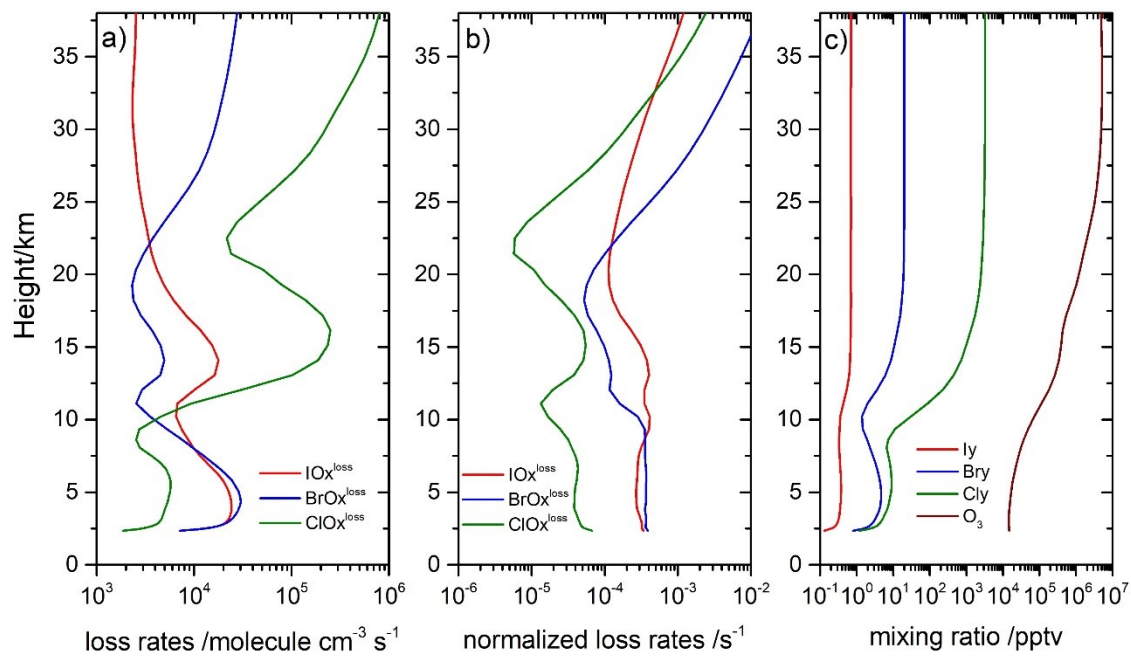

**Figure S13.** Absolute ozone loss rates for the three families BrOx<sup>loss</sup>, ClOx<sup>loss</sup> and IOx<sup>loss</sup> (a), ozone loss rates for the three halogen families normalized to Br<sub>y</sub>, Cl<sub>y</sub> and I<sub>y</sub> concentrations (b), and vertical profile of I<sub>y</sub>, Br<sub>y</sub> and Cl<sub>y</sub> and ozone (c). The data in this figure are results for mean October 1980-2015 output averaged in the 90°S-70°S region from the simulation with iodine. Note: in the middle panel, ozone loss rates for I<sub>x</sub> have been normalized to I<sub>y</sub>+Br<sub>y</sub> mixing ratios.



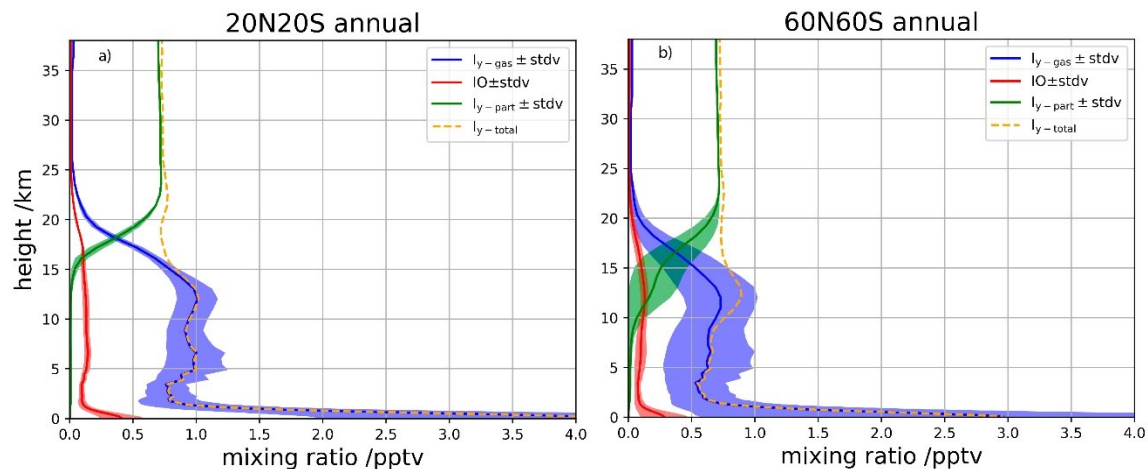

**Figure S14.** Present-day (2015) annual averaged vertical profile of modelled  $I_y$  the tropics (20°S-20°N) (a) and 60°S-60°N regions (b). Shaded areas represent the standard deviation ( $\pm\sigma$ ). These modelled data from the “ $I_{part}$ ” lower limit simulation include a fraction of reactive iodine in gas phase, and the rest as particulate iodine. The dash yellow line (the sum of  $I_{y,gas}$  and  $I_{part}$ , or the equivalent to all iodine in gas phase) produces 10% reduction of stratospheric ozone in the lower part (90°-70°S and 11-16 km altitude) of the Antarctic stratospheric ozone hole. While the blue line (the remaining  $I_y$  in gas phase in a simulation implementing particulate iodine) produces a 3.5% reduction.

|    | <b>CASSCF/aug-cc-pVTZ</b> |          | <b>MRCI+Q/aug-cc-pVTZ</b> |             |
|----|---------------------------|----------|---------------------------|-------------|
|    | Ev(nm)                    | Ead (nm) | Ev(nm)                    | Ead (nm)    |
| S0 | --                        | --       | --                        | --          |
| T1 | 285                       | 516      | <b>259</b>                | <b>490*</b> |
| T2 | 262                       |          | 258                       |             |
| S1 | 240                       | 427      | <b>225</b>                | <b>442*</b> |
| S2 | 239                       |          | 220                       |             |

*\*Not corrected with ZPE*

**Table S1:** Adiabatic ( $E_{ad}$ ) and vertical ( $E_v$ ) excitation energies in nm

| Ground state S <sub>0</sub> (MRCI/USERDEF ENERGY=-520.10916268)        |               |               |               |
|------------------------------------------------------------------------|---------------|---------------|---------------|
| I                                                                      | 0.4255210134  | -0.2373158700 | -0.3727807612 |
| O                                                                      | -0.4151984781 | 1.2188623569  | 0.3242599813  |
| O                                                                      | 2.1070035827  | -0.2373158700 | 0.3242607988  |
| O                                                                      | -0.4151984781 | -1.6934940969 | 0.3242599813  |
| First excited state S <sub>1</sub> (MRCI/USERDEF ENERGY=-520.00593233) |               |               |               |
| I                                                                      | 0.4255204022  | -0.2373158700 | 0.0434215365  |
| O                                                                      | -0.5313697158 | 1.4200706520  | 0.1855258269  |
| O                                                                      | 2.3393466693  | -0.2373158700 | 0.1855268097  |
| O                                                                      | -0.5313697157 | -1.8947023919 | 0.1855258269  |
| First triplet state T <sub>1</sub> (MRCI/USERDEF ENERGY=-520.01590078) |               |               |               |
| I                                                                      | 0.4255040992  | -0.2373986019 | 0.1068690058  |
| O                                                                      | -0.4858157770 | 1.3412221630  | 0.1565547973  |
| O                                                                      | 2.2482541634  | -0.2372888314 | 0.1593931470  |
| O                                                                      | -0.4858148455 | -1.8157982095 | 0.1631130500  |

**Table S2:** XYZ coordinates at MRCI+Q/aug-cc-pVTZ-PP

| IO <sub>3</sub> <sup>-</sup> (CASSCF/aug-cc-pVTZ) |            |            |            |            |            |            |      |
|---------------------------------------------------|------------|------------|------------|------------|------------|------------|------|
|                                                   | $\omega_1$ | $\omega_2$ | $\omega_3$ | $\omega_4$ | $\omega_5$ | $\omega_6$ | ZPE  |
| S <sub>0</sub>                                    | 795        | 795        | 748        | 326        | 278        | 278        | 1611 |
| S <sub>1</sub>                                    | 532        | 468        | 468        | 434        | 86         | 85         | 1038 |
| S <sub>2</sub>                                    | 1046       | 567        | 489        | 489        | 132        | 132        | 1428 |
| T <sub>1</sub>                                    | 552        | 504        | 504        | 256        | 31         | 31         | 908  |

**Table S3:** CASSCF/aug-cc-pVTZ harmonic vibrational frequencies ( $\omega_i$  in cm<sup>-1</sup>) of the low-lying electronic state of IO<sub>3</sub><sup>-</sup>.

| Reaction                                                 | Liquid binary and ternary sulphate polar stratospheric cloud particles reactions | Reactive uptake                        |
|----------------------------------------------------------|----------------------------------------------------------------------------------|----------------------------------------|
| R1                                                       | $N_2O_5 + H_2O(l) \rightarrow 2HNO_3$                                            | $\gamma=f(\text{wt}\%)$                |
| R2                                                       | $ClONO_2 + H_2O(l) \rightarrow HOCl + HNO_3$                                     | $\gamma=f(T, P, HCl, H_2O, r)$         |
| R3                                                       | $BrONO_2 + H_2O(l) \rightarrow HOBr + HNO_3$                                     | $\gamma=f(T, P, H_2O, r)$              |
| R4                                                       | $ClONO_2 + HCl(l) \rightarrow Cl_2 + HNO_3$                                      | $\gamma=f(T, P, HCl, H_2O, r)$         |
| R5                                                       | $HOCl + HCl(l) \rightarrow Cl_2 + H_2O$                                          | $\gamma=f(T, P, HCl, HOCl, H_2O, r)$   |
| R6                                                       | $HOBr + HCl(l) \rightarrow BrCl + H_2O$                                          | $\gamma=f(T, P, HCl, HOBr, H_2O, r)$   |
| R7                                                       | $HOCl + HBr(l) \rightarrow BrCl + H_2O$                                          | $\gamma=\gamma(R6)$                    |
| R8                                                       | $HOBr + HBr(l) \rightarrow Br_2 + H_2O$                                          | $\gamma=\gamma(R6)$                    |
| R9                                                       | $HOCl + HI(l) \rightarrow ICl + H_2O$                                            | $\gamma=\gamma(R6)$                    |
| R10                                                      | $HOBr + HI(l) \rightarrow IBr + H_2O$                                            | $\gamma=\gamma(R6)$                    |
| R11                                                      | $IONO_2 + H_2O(l) \rightarrow HOI + HNO_3$                                       | $\gamma=\gamma(R3)$                    |
| R12                                                      | $HOI + HCl(l) \rightarrow ICl + H_2O$                                            | $\gamma=\gamma(R6)$                    |
| R13                                                      | $HOI + HBr(l) \rightarrow IBr + H_2O$                                            | $\gamma=\gamma(R6)$                    |
| R14                                                      | $HOI + HI(l) \rightarrow I_2 + H_2O$                                             | $\gamma=\gamma(R6)$                    |
| R15                                                      | $IONO_2 + H_2O(l) \rightarrow I_{part}$                                          | $\gamma=0.01$                          |
| R16                                                      | $HOI + HCl(l) \rightarrow I_{part}$                                              | $\gamma=0.01$                          |
| <b>Nitric acid trihydrate reactions</b>                  |                                                                                  |                                        |
| R17                                                      | $N_2O_5 + H_2O(s) \rightarrow 2HNO_3$                                            | $\gamma=0.0004$ , JPL10-6 (4)          |
| R18                                                      | $ClONO_2 + H_2O(s) \rightarrow HOCl + HNO_3$                                     | $\gamma=0.004$ , JPL10-6 (4)           |
| R19                                                      | $ClONO_2 + HCl(s) \rightarrow Cl_2 + HNO_3$                                      | $\gamma=0.2$ , JPL10-6 (4)             |
| R20                                                      | $HOCl + HCl(s) \rightarrow Cl_2 + H_2O$                                          | $\gamma=0.1$ , JPL10-6 (4)             |
| R21                                                      | $HOBr + HCl(s) \rightarrow BrCl + H_2O$                                          | $\gamma=\gamma(R20)$                   |
| R22                                                      | $HOCl + HBr(s) \rightarrow BrCl + H_2O$                                          | $\gamma=\gamma(R20)$                   |
| R23                                                      | $HOBr + HBr(s) \rightarrow Br_2 + H_2O$                                          | $\gamma=\gamma(R20)$                   |
| R24                                                      | $HOCl + HI(s) \rightarrow ICl + H_2O$                                            | $\gamma=\gamma(R20)$                   |
| R25                                                      | $HOBr + HI(s) \rightarrow IBr + H_2O$                                            | $\gamma=\gamma(R20)$                   |
| R26                                                      | $BrONO_2 + H_2O(s) \rightarrow HOBr + HNO_3$                                     | $\gamma=0.006$ Davies et al., 2002 (5) |
| R27                                                      | $IONO_2 + H_2O(s) \rightarrow HOI + HNO_3$                                       | $\gamma=\gamma(R26)$                   |
| R28                                                      | $HOI + HCl(s) \rightarrow ICl + H_2O$                                            | $\gamma=\gamma(R20)$                   |
| R29                                                      | $HOI + HBr(s) \rightarrow IBr + H_2O$                                            | $\gamma=\gamma(R20)$                   |
| R30                                                      | $HOI + HI(s) \rightarrow I_2 + H_2O$                                             | $\gamma=\gamma(R20)$                   |
| R31                                                      | $IONO_2 + H_2O(s) \rightarrow I_{part}$                                          | $\gamma=0.01$                          |
| R32                                                      | $HOI + HCl(s) \rightarrow I_{part}$                                              | $\gamma=0.01$                          |
| <b>Water ice polar stratospheric particles reactions</b> |                                                                                  |                                        |
| R33                                                      | $N_2O_5 + H_2O(s) \rightarrow 2HNO_3$                                            | $\gamma=0.02$ , JPL10-6 (4)            |
| R34                                                      | $ClONO_2 + H_2O(s) \rightarrow HOCl + HNO_3$                                     | $\gamma=0.3$ , JPL10-6 (4)             |
| R35                                                      | $BrONO_2 + H_2O(s) \rightarrow HOBr + HNO_3$                                     | $\gamma=0.3$ , JPL10-6 (4)             |
| R36                                                      | $ClONO_2 + HCl(s) \rightarrow Cl_2 + HNO_3$                                      | $\gamma=0.3$ , JPL10-6 (4)             |
| R37                                                      | $HOCl + HCl(s) \rightarrow Cl_2 + H_2O$                                          | $\gamma=0.2$ , JPL10-6 (4)             |
| R38                                                      | $HOBr + HCl(s) \rightarrow BrCl + H_2O$                                          | $\gamma=0.3$ , JPL10-6 (4)             |
| R39                                                      | $HOCl + HBr(s) \rightarrow BrCl + H_2O$                                          | $\gamma=\gamma(R37)$                   |
| R40                                                      | $HOBr + HBr(s) \rightarrow Br_2 + H_2O$                                          | $\gamma=\gamma(R38)$                   |
| R41                                                      | $HOCl + HI(s) \rightarrow ICl + H_2O$                                            | $\gamma=\gamma(R37)$                   |
| R42                                                      | $HOBr + HI(s) \rightarrow IBr + H_2O$                                            | $\gamma=\gamma(R37)$                   |
| R43                                                      | $IONO_2 + H_2O(s) \rightarrow HOI + HNO_3$                                       | $\gamma=\gamma(R35)$                   |
| R44                                                      | $HOI + HCl(s) \rightarrow ICl + H_2O$                                            | $\gamma=\gamma(R38)$                   |
| R45                                                      | $HOI + HBr(s) \rightarrow IBr + H_2O$                                            | $\gamma=\gamma(R38)$                   |
| R46                                                      | $HOI + HI(s) \rightarrow I_2 + H_2O$                                             | $\gamma=\gamma(R38)$                   |
| R47                                                      | $IONO_2 + H_2O(s) \rightarrow I_{part}$                                          | $\gamma=0.01$                          |

**Table S4.** Summary of stratospheric heterogeneous bromine, chlorine and iodine reactions on liquid binary and ternary sulfate polar stratospheric cloud particles, nitric acid trihydrate and water ice polar stratospheric particles considered in WACCM4. Uptake coefficients ( $\gamma$ ) for iodine reactions have been mapped to their equivalent reactions for bromine. Reactions highlighted in blue are the additional heterogeneous iodine reactions with respect to the standard WACCM scheme.

## SI References

1. H. Wen, G.-L. Hou, W. Huang, N. Govind, X.-B. Wang, Photoelectron spectroscopy of higher bromine and iodine oxide anions: Electron affinities and electronic structures of BrO<sub>2</sub>,<sub>3</sub> and IO<sub>2</sub>-4 radicals. *J. Chem. Phys.* **135**, 184309 (2011).
2. Ó. Gálvez, M. T. Baeza-Romero, M. Sanz, A. Saiz-Lopez, Photolysis of frozen iodate salts as a source of active iodine in the polar environment. *Atmos. Chem. Phys.* **16**, 12703–12713 (2016).
3. S. Tilmes, *et al.*, Technical Note: Ozonesonde climatology between 1995 and 2011: description, evaluation and applications. *Atmos. Chem. Phys.* **12**, 7475–7497 (2012).
4. JPL, Chemical Kinetics and Photochemical Data for Use in Atmospheric Studies, vol. 17. *JPL Publ. 10-6, Jet Propuls. Lab., Pasadena* (2011).
5. S. Davies, *et al.*, Modeling the effect of denitrification on Arctic ozone depletion during winter 1999/2000. *J. Geophys. Res. Atmos.* **107**, SOL 65-1-SOL 65-18 (2002).
